# Supplementary material for: Mitochondrial Damage and Necroptosis in Aging Cochlea
Source: MDPI journal article supplement (doi:10.3390/ijms21072505), 2020-04-03
Supplement: s1 [file s1]

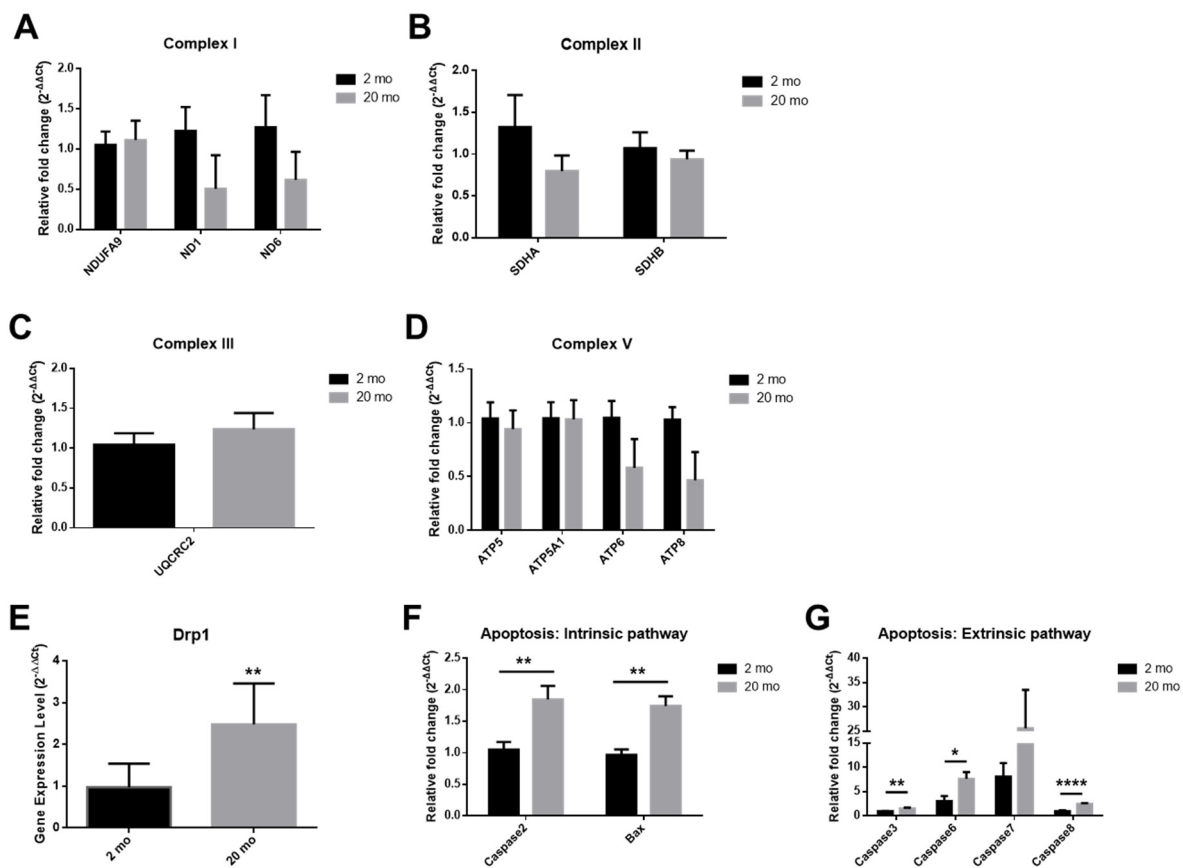

**Supplementary Figure 1.** Mitochondrial respiratory chain complexes-, dynamin-related protein 1 (*Drp1*)-, and apoptosis-related genes in young and aging cochleae. qRT-PCR for genes related to mitochondrial respiratory chain complexes (A–D), *Drp1* (E) and intrinsic (F) and extrinsic (G) pathways of apoptosis in young (2 months old) and aged (20 months old) mice. Graphs represent mean  $\pm$  S.E.M. \*  $p < 0.05$ , \*\*  $p < 0.01$ , \*\*\*\*  $p < 0.0001$ . Unpaired *t*-test.  $n = 5-8$ .
